# Supplementary material
Source: PubMed Central journal article supplement (PMC8640411)
Supplement: flgastro-2020-101735supp001.pdf [file flgastro-2020-101735supp001.pdf]

**Supplementary Figure 1: Tools to measure severity of bleeding**

## Rectal bleeding score

| Symptoms             | Score | Diarrhoea                                                        |
|----------------------|-------|------------------------------------------------------------------|
| Diarrhoea            | 0     | Absent                                                           |
|                      | 1     | 1-3 stools/24 hours                                              |
|                      | 2     | 4-6 stools/24 hours                                              |
|                      | 3     | >6 stools/24 hours                                               |
| Bleeding             | 0     | No blood                                                         |
|                      | 1     | Blood on toilet paper/in stool                                   |
|                      | 2     | Blood in toilet bowl                                             |
|                      | 3     | Heavy bleeding with clots                                        |
|                      | 4     | Bleeding requiring transfusion                                   |
| Tenesmus/rectal pain | 0     | Absent                                                           |
|                      | 1     | Mild tenesmus not requiring any drug                             |
|                      | 2     | Tenesmus requiring analgesics/antispasmodics                     |
|                      | 3     | Severe tenesmus requiring daily use of analgesics/antispasmodics |

## Endoscopy severity score

| Grade    | Score | Description                   |
|----------|-------|-------------------------------|
| Normal   | 0     | Normal mucosa                 |
| Mild     | 3     | Erythema and/or telangectasia |
| Moderate | 6     | Friability                    |
| Severe   | 9     | Ulceration and/or necrosis    |

**Total score:** \_\_\_\_\_

## Patient-reported diary

| Day | Time | Stool passed<br>Yes/No | Stool consistency<br>(stool chart) | Blood on wiping<br>Yes/No | Blood in pan<br>Yes/No | Is the bleeding less<br>heavy<br>Yes/No | Clots in pan<br>Yes/No | Accidents with blood<br>Yes/No |
|-----|------|------------------------|------------------------------------|---------------------------|------------------------|-----------------------------------------|------------------------|--------------------------------|
| 1   |      |                        |                                    |                           |                        |                                         |                        |                                |
|     |      |                        |                                    |                           |                        |                                         |                        |                                |
|     |      |                        |                                    |                           |                        |                                         |                        |                                |
|     |      |                        |                                    |                           |                        |                                         |                        |                                |
|     |      |                        |                                    |                           |                        |                                         |                        |                                |
|     |      |                        |                                    |                           |                        |                                         |                        |                                |
|     |      |                        |                                    |                           |                        |                                         |                        |                                |
|     |      |                        |                                    |                           |                        |                                         |                        |                                |
|     |      |                        |                                    |                           |                        |                                         |                        |                                |
|     |      |                        |                                    |                           |                        |                                         |                        |                                |
| 2   |      |                        |                                    |                           |                        |                                         |                        |                                |
|     |      |                        |                                    |                           |                        |                                         |                        |                                |
|     |      |                        |                                    |                           |                        |                                         |                        |                                |
|     |      |                        |                                    |                           |                        |                                         |                        |                                |
|     |      |                        |                                    |                           |                        |                                         |                        |                                |
|     |      |                        |                                    |                           |                        |                                         |                        |                                |
|     |      |                        |                                    |                           |                        |                                         |                        |                                |
|     |      |                        |                                    |                           |                        |                                         |                        |                                |
|     |      |                        |                                    |                           |                        |                                         |                        |                                |
|     |      |                        |                                    |                           |                        |                                         |                        |                                |

**Supplementary Table 2: Zinicola Score**

|          | <b>Distribution of telangectasia</b>   | <b>Surface area of telangectasia</b> | <b>Presence of fresh blood</b> |
|----------|----------------------------------------|--------------------------------------|--------------------------------|
| <b>0</b> |                                        |                                      | None                           |
| <b>1</b> | Distal rectum (within 10cm anal verge) | <50%                                 | Some                           |
| <b>2</b> | Entire rectum                          | >50%                                 |                                |

2-Grade A; 3-Grade B; 4/5-Grade C

Grade \_\_\_\_\_
